# Supplementary material for: Study on the absorption characteristics of euscaphic acid and tiliroside in fruits of Rosa laxa Retz
Source: PeerJ. 2025 Jan 16;13:e18638. doi: 10.7717/peerj.18638 (PMC11742250; doi:10.7717/peerj.18638)
Supplement: Supplemental Information 1 [file peerj-13-18638-s001.xlsx]

## Sheet: Fig 3
Fig.3A
material-liquid ratio	compositeensive score
01:15:00	75.53	75.68	77.21	76.14±0.93
01:20:00	79.98	78.54	78.98	79.17±0.74
01:25:00	81.93	82.54	81.03	81.83±0.76
01:30:00	92.38	91.89	93.31	92.53±0.72
01:35:00	85.36	86.01	85.97	85.78±0.36
01:40:00	82.92	81.47	83.42	82.60±1.01
Fig.3b
ethanol concentration	compositeensive score
0.4	59.6	58.21	60.21	59.34±1.03
0.5	88.67	87.02	88.98	88.22±1.05
0.6	91.49	92.02	93.03	92.18±0.78
0.7	87.32	85.98	88.68	87.33±1.35
0.8	85.01	86.54	84.57	85.37±1.03
Fig.3C
Time(min)	compositeensive score
60	86.55	87.01	86.99	86.85±0.26
90	87.45	88.01	87.42	87.63±0.33
120	91.93	91.31	92.43	91.89±0.56
150	93.34	93.87	94.01	93.74±0.35
180	89.48	90.24	89.87	89.86±0.38
Fig. 3D-Fig. 3I are calculated from the data of Fig. 3A-Fig. 3C after software simulation and do not involve original data.

## Sheet: Fig 4
Fig.4B
Time(day)	TEER value
1	91	96	94	93.67±2.52
3	152	148	154	151.33±3.06
5	298	302	294	298.00±4.00
7	353	350	361	354.67±5.68
9	469	460	475	468.00±7.55
11	553	548	561	554.00±6.56
15	627	640	620	629.00±10.15
20	703	712	699	704.67±6.66
Fig.4C
FRLE concentration(μg/mL)	Cell viability(%)
0.5	100.71	99.25	98.54	99.5±1.11
1	105.31	100.47	102.34	102.71±2.44
10	105.43	98.24	101.35	101.67±3.61
25	110.9	103.47	104.35	106.24±4.06
50	93.07	90.25	98.41	93.91±4.14
75	94.11	92.57	90.23	92.30±1.95
100	86.91	88.29	85.24	86.81±1.53
200	70.67	71.84	67.58	70.03±2.20

## Sheet: Fig 5 and Table 7
Fig. 5A-C
	A-B			B-A			A-B			B-A			A-B			B-A
Time(min)	FRLE euscaphic acid (low concentration)						FRLE euscaphic acid (medium concentration)						FRLE euscaphic acid (high concentration)
15	0.39079	0.38959	0.39254	0.21496	0.23695	0.22536	0.65534	0.65413	0.66587	0.26452	0.26487	0.26558	0.4109	0.406306	0.419241	0.90793	0.909047	0.926361
30	0.6477	0.64875	0.63848	0.37718	0.386874	0.373333	0.99932	0.979333	1.05159	0.40914	0.400957	0.423705	0.719	0.719884	0.704613	1.56165	1.55228	1.55353
60	0.76551	0.78421	0.76684	0.57485	0.571401	0.595315	1.35765	1.39254	1.35059	0.73574	0.728235	0.753766	0.81998	0.810878	0.849171	1.76912	1.74934	1.73372
90	1.25724	1.38586	1.28804	1.15354	1.14064	1.21388	1.26103	1.24693	1.29193	1.103	1.09067	1.08093	0.97608	0.965978	0.971004	2.40819	2.47008	2.53416
120	1.43224	1.42365	1.41763	1.33369	1.32569	1.32009	1.52232	1.51319	1.56884	1.61248	1.59603	1.69683	2.39532	2.38095	2.44409	2.98556	2.95511	3.09185
150	2.2501	2.22512	2.3678	1.66511	1.83545	1.63179	2.3465	2.35631	2.43004	2.01619	2.06801	2.05724	2.59161	2.56518	2.68387	3.70388	3.66554	3.71436
180	2.30112	2.2551	2.30763	2.02529	2.00463	2.08718	2.55475	2.52869	2.56198	2.18935	2.19204	2.19555	3.18858	3.27053	3.2535	4.33974	4.25294	4.56675
Fig. 5D-F
	A-B			B-A			A-B			B-A			A-B			B-A
Time(min)	FRLE euscaphic acid+Ver (low concentration)						FRLE euscaphic acid+Ver (medium concentration)						FRLE euscaphic acid +Ver (high concentration)
15	0.65863	0.63589	0.67846	0.07336	0.0718927	0.074589	0.02189	0.02107	0.02182	0.11149	0.11124	0.11051	1.95762	1.93573	2.00558	0.226	0.223695	0.221478
30	1.85635	1.8356	1.90183	0.19653	0.201581	0.195862	0.08639	0.08854	0.08564	0.52757	0.517018	0.520145	2.3509	2.41132	2.4199	1.71002	1.71212	1.76228
60	2.74722	2.71673	2.75542	0.61804	0.61113	0.605673	0.5529	0.56711	0.57489	0.71098	0.684347	0.701254	2.83402	2.77734	2.89172	2.36948	2.34318	2.45383
90	4.09576	4.05398	4.0138	1.06707	1.05619	1.09321	1.73448	1.66951	1.73939	0.76125	0.780814	0.77584	3.22662	3.10575	3.23575	2.25551	2.17102	2.26189
120	4.55563	4.67271	4.69485	1.93578	1.86327	1.99494	2.27301	2.24948	2.28054	1.36308	1.37549	1.36521	4.92218	4.87197	4.89658	2.49708	2.48762	2.54777
150	5.50659	5.39645	5.70262	3.22903	3.16445	3.34398	3.98649	4.08894	4.01256	2.88462	2.8552	2.86541	5.83321	5.77284	5.95162	2.85628	2.79915	2.84143
180	6.83366	6.57767	6.853	4.91972	4.92586	4.93364	6.38221	6.54784	6.21068	4.96448	4.95632	4.98746	6.35914	6.28855	6.48861	6.31353	6.24294	6.46821
Fig. 5D-F
	A-B			B-A			A-B			B-A			A-B			B-A
Time(min)	FRLE euscaphic acid+CsA(low concentration)						FRLE euscaphic acid+CsA (medium concentration)						FRLE euscaphic acid +CsA (high concentration)
15	0.32641	0.319881	0.343485	0.0696	0.0713887	0.0710129	0.13328	0.131921	0.133254	0.27668	0.28756	0.27543	0.61098	0.62573	0.610858	0.62024	0.597006	0.639195
30	0.54005	0.553929	0.559276	0.1378	0.136374	0.135043	0.20605	0.203746	0.201927	0.38217	0.377897	0.391533	0.66209	0.637288	0.648842	3.07753	3.08849	3.15293
60	0.64776	0.641056	0.667556	0.51419	0.508482	0.532495	0.85945	0.827255	0.819987	1.18362	1.21404	1.22576	0.9595	0.94885	0.983008	6.81904	6.82743	7.0618
90	2.78274	2.75185	2.92831	0.81847	0.80932	0.838523	0.70716	0.693016	0.69301	1.60316	1.58536	1.59101	1.72285	1.72497	1.76506	7.84421	8.04581	7.68725
120	3.08228	3.05084	3.19201	1.09569	1.07378	1.12917	1.08891	1.11689	1.08651	2.34968	2.30268	2.33746	1.85137	1.89895	1.84174	7.99856	7.95471	8.0212
150	3.55155	3.41851	3.50214	2.54657	2.45118	2.67978	3.72979	3.69175	3.71986	3.5266	3.39449	3.45603	5.05761	5.07562	5.21217	8.75457	8.66396	8.77935
180	3.77104	3.75489	3.76548	4.69702	4.64911	4.68574	5.01657	5.1455	5.00156	5.03264	5.16198	5.1348	5.8432	5.77787	5.84632	9.2072	9.23014	9.39411
Fig. 5G-I
	A-B			B-A			A-B			B-A			A-B			B-A
Time(min)	FRLE euscaphic acid+EGTA(low concentration)						FRLE euscaphic acid+EGTA (medium concentration)						FRLE euscaphic acid +EGTA (high concentration)
15	0.6224	0.62254	0.622276	0.13096	0.131121	0.135622	0.02175	0.02174	0.0224147	0.13988	0.140378	0.142728	0.42065	0.415947	0.430956	0.96308	0.927003	0.958072
30	0.69688	0.682942	0.70012	0.70031	0.718308	0.696668	0.0572	0.0566166	0.0601921	0.1837	0.188421	0.188201	0.44318	0.426578	0.440875	2.24898	2.30678	2.32904
60	1.14692	1.13419	1.17502	1.16338	1.15047	1.16315	0.5208	0.514977	0.509647	0.34311	0.33961	0.343041	1.51026	1.49338	1.56403	4.34157	4.35124	4.3407
90	1.27647	1.2622	1.21492	1.23193	1.21918	1.29637	0.79915	0.819688	0.818729	0.42836	0.423571	0.44361	1.84352	1.8909	1.84874	4.75123	4.57325	4.86764
120	2.17323	2.22908	2.2506	1.86497	1.82767	1.90283	1.39847	1.38295	1.42686	2.56931	2.54272	2.57658	8.20478	7.89743	8.4058	7.92704	7.93679	8.12125
150	2.93252	2.87387	3.08592	3.63577	3.64024	3.64606	2.41041	2.32012	2.49622	3.92564	3.77859	3.90523	8.71642	8.54208	8.75423	10.9128	10.9542	11.3013
180	5.03905	4.9869	5.14134	5.07288	5.08457	5.25347	5.88223	5.81647	5.76453	5.68926	5.62565	5.65871	9.38245	9.35476	9.57348	11.4612	11.502	11.6939
Fig. 5J-L
	A-B			B-A			A-B			B-A			A-B			B-A
Time(min)	FRLE euscaphic acid pH=5.00(low concentration)						FRLE euscaphic acid pH=5.00 (medium concentration)						FRLE euscaphic acid pH=5.00 (high concentration)
15	0.48103	0.475652	0.490795	0.70673	0.699521	0.721077	1.40213	1.40385	1.43648	2.71725	2.72692	2.78382	3.02263	3.02635	3.13024	2.7901	2.79353	2.93605
30	1.00994	0.99873	1.04589	1.3184	1.30377	1.3507	2.40291	2.35485	2.46178	3.74641	3.75102	3.87978	4.11274	3.95868	4.2135	3.16702	3.04838	3.2638
60	1.33493	1.28492	1.38245	1.9682	1.89447	2.03827	3.74939	3.75214	3.76	4.80154	4.75256	4.97247	5.3238	5.46062	5.43187	4.45203	4.56645	4.46463
90	1.99307	1.97274	2.0419	2.29997	2.27651	2.30648	5.11254	5.24393	5.21632	5.5216	5.31476	5.65688	6.46474	6.39783	6.33538	5.515	5.45378	5.65012
120	2.51456	2.48853	2.5914	2.70979	2.68174	2.75066	5.97723	5.91626	6.19002	6.69244	6.86444	6.8564	7.9981	7.90932	8.16094	7.05328	6.98028	7.30438
150	2.84789	2.79093	2.83308	3.00401	3.08121	3.16115	6.96595	6.99543	6.96456	8.26572	8.18141	8.43351	9.5609	9.59494	9.58796	9.27588	9.3089	9.09027
180	3.51633	3.6067	3.44597	4.06707	4.02559	4.14988	8.57213	8.40068	8.78215	9.9412	9.8398	10.1436	11.3922	11.2648	11.3874	11	11.1125	10.9978
Fig. 5J-L
	A-B			B-A			A-B			B-A			A-B			B-A
Time(min)	FRLE euscaphic acid pH=6.00(low concentration)						FRLE euscaphic acid pH=6.00 (medium concentration)						FRLE euscaphic acid pH=6.00 (high concentration)
15	3.08828	2.97259	3.24983	3.28311	3.28715	3.34976	3.72936	3.84576	3.70997	4.08828	4.09331	4.18844	3.25565	3.26724	3.45733	3.95876	3.91482	3.95797
30	4.11894	4.07693	4.26557	3.29494	3.37962	3.4673	5.00324	5.03657	5.12582	5.42378	5.56317	5.4227	4.30421	4.25643	4.40966	5.52941	5.54909	5.81865
60	5.17248	5.11465	5.27748	4.30874	4.26479	4.32093	6.15894	6.31722	6.34832	7.32495	7.25024	7.33547	5.96779	5.90692	5.92795	7.92417	8.12782	7.76561
90	6.54703	6.47436	6.70743	4.7106	4.65794	4.85456	6.91814	6.84654	7.08763	10.351	10.617	10.7195	6.53209	6.69996	6.76463	9.02624	8.93417	9.20947
120	7.19887	7.38388	7.05482	5.44693	5.38647	5.64084	9.06753	8.97504	9.06572	11.7558	12.0579	11.6946	10.393	10.2854	10.185	11.2883	11.0625	11.5648
150	8.03458	7.87388	8.28012	6.42924	6.1884	6.76555	10.6761	10.7855	10.8934	13.3336	13.3569	13.605	12.6251	12.4849	12.6608	12.9711	12.4852	12.5874
180	8.3838	8.06974	8.07967	7.94044	7.90256	7.78155	12.3361	13.2547	12.5873	14.6773	14.5687	14.7188	14.721	14.5564	15.0198	15.0502	14.882	14.972
Fig. 5M-O
	A-B			B-A			A-B			B-A			A-B			B-A
Time(min)	FRLE euscaphic acid pH=5.00(low concentration)						FRLE euscaphic acid pH=5.00 (medium concentration)						FRLE euscaphic acid pH=5.00 (high concentration)
15	0.48103	0.475652	0.490795	0.70673	0.699521	0.721077	1.40213	1.40385	1.43648	2.71725	2.72692	2.78382	3.02263	3.02635	3.13024	2.7901	2.79353	2.93605
30	1.00994	0.99873	1.04589	1.3184	1.30377	1.3507	2.40291	2.35485	2.46178	3.74641	3.75102	3.87978	4.11274	3.95868	4.2135	3.16702	3.04838	3.2638
60	1.33493	1.28492	1.38245	1.9682	1.89447	2.03827	3.74939	3.75214	3.76	4.80154	4.75256	4.97247	5.3238	5.46062	5.43187	4.45203	4.56645	4.46463
90	1.99307	1.97274	2.0419	2.29997	2.27651	2.30648	5.11254	5.24393	5.21632	5.5216	5.31476	5.65688	6.46474	6.39783	6.33538	5.515	5.45378	5.65012
120	2.51456	2.48853	2.5914	2.70979	2.68174	2.75066	5.97723	5.91626	6.19002	6.69244	6.86444	6.8564	7.9981	7.90932	8.16094	7.05328	6.98028	7.30438
150	2.84789	2.79093	2.83308	3.00401	3.08121	3.16115	6.96595	6.99543	6.96456	8.26572	8.18141	8.43351	9.5609	9.59494	9.58796	9.27588	9.3089	9.09027
180	3.51633	3.6067	3.44597	4.06707	4.02559	4.14988	8.57213	8.40068	8.78215	9.9412	9.8398	10.1436	11.3922	11.2648	11.3874	11	11.1125	10.9978
Fig. 5M-O
	A-B			B-A			A-B			B-A			A-B			B-A
Time(min)	FRLE euscaphic acid pH=6.00(low concentration)						FRLE euscaphic acid pH=6.00 (medium concentration)						FRLE euscaphic acid pH=6.00 (high concentration)
15	3.08828	2.97259	3.24983	3.28311	3.28715	3.34976	3.72936	3.84576	3.70997	4.08828	4.09331	4.18844	3.25565	3.26724	3.45733	3.95876	3.91482	3.95797
30	4.11894	4.07693	4.26557	3.29494	3.37962	3.4673	5.00324	5.03657	5.12582	5.42378	5.56317	5.4227	4.30421	4.25643	4.40966	5.52941	5.54909	5.81865
60	5.17248	5.11465	5.27748	4.30874	4.26479	4.32093	6.15894	6.31722	6.34832	7.32495	7.25024	7.33547	5.96779	5.90692	5.92795	7.92417	8.12782	7.76561
90	6.54703	6.47436	6.70743	4.7106	4.65794	4.85456	6.91814	6.84654	7.08763	10.351	10.617	10.7195	6.53209	6.69996	6.76463	9.02624	8.93417	9.20947
120	7.19887	7.38388	7.05482	5.44693	5.38647	5.64084	9.06753	8.97504	9.06572	11.7558	12.0579	11.6946	10.393	10.2854	10.185	11.2883	11.0625	11.5648
150	8.03458	7.87388	8.28012	6.42924	6.1884	6.76555	10.6761	10.7855	10.8934	13.3336	13.3569	13.605	12.6251	12.4849	12.6608	12.9711	12.4852	12.5874
180	8.3838	8.06974	8.07967	7.94044	7.90256	7.78155	12.3361	13.2547	12.5873	14.6773	14.5687	14.7188	14.721	14.5564	15.0198	15.0502	14.882	14.972
Fig. 5M-O
	A-B			B-A			A-B			B-A			A-B			B-A
Time(min)	FRLE euscaphic acid pH=8.00(low concentration)						FRLE euscaphic acid pH=8.00 (medium concentration)						FRLE euscaphic acid pH=8.00 (high concentration)
15	0.219545	0.218871	0.220528	0.120764	0.1354	0.126607	0.412164	0.411403	0.418786	0.166365	0.166585	0.167031	0.238895	0.236224	0.243745	0.527866	0.424788	0.538582
30	0.363876	0.364466	0.358697	0.211899	0.221071	0.209738	0.628503	0.615932	0.66138	0.257321	0.252174	0.266481	0.418023	0.418537	0.409659	0.907936	0.725365	0.903215
60	0.430062	0.440567	0.430809	0.322949	0.326515	0.334446	0.853868	0.875812	0.849428	0.46273	0.45801	0.474066	0.476733	0.471441	0.493704	1.02856	0.817449	1.00798
90	0.706315	0.778571	0.723619	0.648056	0.651796	0.681956	0.793101	0.784234	0.812532	0.693711	0.685955	0.67983	0.567488	0.561615	0.564537	1.40011	1.15424	1.47335
120	0.804629	0.799801	0.796422	0.749264	0.757536	0.741622	0.957434	0.951689	0.986693	1.01414	1.00379	1.06719	1.39263	1.38427	1.42098	1.73579	1.38089	1.79758
150	1.13641	1.25007	1.19586	0.935455	1.04883	0.916737	1.47579	1.48196	1.52832	1.26804	1.30063	1.29386	1.50675	1.49138	1.56039	2.15342	1.71287	2.15951
180	1.29276	1.26691	1.29642	1.15731	1.1455	1.19268	1.60676	1.59037	1.61131	1.69717	1.69926	1.70197	1.85383	1.90147	1.89157	2.02792	1.98736	2.134
Fig. 5M-O
	A-B			B-A			A-B			B-A			A-B			B-A
Time(min)	FRLE euscaphic acid pH=9.00(low concentration)						FRLE euscaphic acid pH=9.00 (medium concentration)						FRLE euscaphic acid pH=9.00 (high concentration)
15	0.078158	0.077918	0.078508	0.0448768	0.0494677	0.047048	0.134016	0.133769	0.13617	0.0585221	0.0585996	0.0587566	0.0712132	0.070417	0.0726588	0.101445	0.101569	0.103504
30	0.12954	0.12975	0.127696	0.0787432	0.0807669	0.07794	0.20436	0.200273	0.21505	0.0905177	0.0887073	0.0937401	0.12461	0.124763	0.122117	0.174486	0.173439	0.173579
60	0.153102	0.156842	0.153368	0.12001	0.11929	0.124283	0.277638	0.284773	0.276194	0.162774	0.161114	0.166762	0.142111	0.140533	0.14717	0.197667	0.195457	0.193712
90	0.251448	0.277171	0.257608	0.240823	0.23813	0.25342	0.257879	0.254996	0.264197	0.244027	0.241298	0.239144	0.169165	0.167414	0.168285	0.269072	0.275987	0.283147
120	0.286448	0.284729	0.283526	0.278432	0.276762	0.275592	0.311313	0.309445	0.320827	0.356743	0.353105	0.375405	0.415133	0.412643	0.423586	0.333582	0.33018	0.345458
150	0.45002	0.445025	0.473561	0.347622	0.383184	0.340666	0.479857	0.481863	0.49694	0.44606	0.457523	0.455142	0.449153	0.444571	0.465142	0.413841	0.409558	0.415013
180	0.460224	0.451019	0.461526	0.422816	0.418504	0.435738	0.522444	0.517115	0.523922	0.484369	0.484965	0.48574	0.552614	0.566816	0.563865	0.545879	0.534961	0.574434

## Sheet: Fig 6 and Table 8
Fig. 6A-C
	A-B			B-A			A-B			B-A			A-B			B-A
Time(min)	FRLE tiliroside(low concentration)						FRLE tiliroside(medium concentration)						FRLE tiliroside(high concentration)
15	0.03279	0.0327395	0.03278	0.01746	0.01747	0.01745	0.03253	0.03252	0.03251	0.01974	0.01972	0.0203433	0.04358	0.04354	0.0435203	0.02064	0.02062	0.0206117
30	0.03943	0.0407004	0.03942	0.02436	0.0240877	0.0252272	0.03635	0.0349883	0.0374609	0.02304	0.0221769	0.0242452	0.05183	0.0512547	0.0536751	0.02477	0.0244951	0.0256518
60	0.04626	0.0456873	0.04625	0.029	0.02842	0.0295513	0.0436	0.042728	0.0458807	0.02781	0.0275013	0.0288	0.06521	0.064481	0.0648709	0.03937	0.0385826	0.0385822
90	0.05452	0.0536602	0.0555564	0.03616	0.0357557	0.037265	0.05605	0.0554278	0.0580454	0.03466	0.0342725	0.0344798	0.06889	0.0663094	0.0713425	0.04609	0.0455747	0.0477308
120	0.06132	0.0606393	0.06132	0.04261	0.0410138	0.0448389	0.06504	0.0643129	0.0673554	0.04719	0.0462462	0.04887	0.08656	0.0855923	0.084828	0.07826	0.0753284	0.0806516
150	0.0715	0.0714	0.07161	0.05215	0.05216	0.0511065	0.07342	0.0725992	0.0719509	0.05682	0.0561848	0.055683	0.09273	0.0908753	0.0975807	0.1041	0.106775	0.109545
180	0.07861	0.07859	0.0785023	0.06435	0.0660038	0.0666409	0.10322	0.105873	0.102683	0.07765	0.0796456	0.0791261	0.11548	0.118448	0.119009	0.12916	0.127716	0.128488
Fig. 6D-F
	A-B			B-A			A-B			B-A			A-B			B-A
Time(min)	FRLE tiliroside+Ver (low concentration)						FRLE tiliroside+Ver (medium concentration)						FRLE tiliroside+Ver (high concentration)
15	0.02608	0.0269203	0.0265758	0.0306	0.0315859	0.03062	0.03114	0.0321433	0.0320916	0.03488	0.0360038	0.0348322	0.02774	0.02756	0.027702	0.03438	0.03469	0.0350336
30	0.03677	0.0363589	0.0378937	0.03724	0.0364952	0.0383781	0.03945	0.0390089	0.0401999	0.04295	0.0401449	0.0420906	0.03899	0.039992	0.0382098	0.04248	0.0435717	0.0439923
60	0.0442	0.043316	0.0457735	0.05111	0.0505386	0.0500873	0.04598	0.044256	0.0457409	0.049	0.0502593	0.0504974	0.05706	0.0588985	0.0590913	0.05392	0.0519002	0.0558396
90	0.05284	0.0522535	0.0556041	0.0599	0.0592351	0.0620324	0.05662	0.0559915	0.055487	0.07041	0.0696284	0.0700439	0.07567	0.074824	0.0752765	0.0879	0.0907321	0.0874429
120	0.05636	0.0542488	0.0583664	0.07135	0.0686772	0.0738901	0.06556	0.0642487	0.0689894	0.08974	0.0926314	0.0944343	0.08973	0.0879353	0.0924721	0.10216	0.100117	0.105282
150	0.06466	0.0639371	0.0633662	0.08123	0.0833176	0.0854791	0.08504	0.0872255	0.0849235	0.10281	0.100754	0.100753	0.10843	0.107218	0.11229	0.11654	0.115237	0.11638
180	0.07979	0.0818406	0.0793751	0.08727	0.0862943	0.0868162	0.10533	0.101384	0.107332	0.13015	0.125275	0.132624	0.14083	0.14587	0.143507	0.14597	0.150673	0.145211
Fig. 6D-F
	A-B			B-A			A-B			B-A			A-B			B-A
Time(min)	FRLE tiliroside+CsA(low concentration)						FRLE tiliroside+CsA (medium concentration)						FRLE tiliroside+CsA (high concentration)
15	0.02963	0.0293011	0.0301933	0.03185	0.03184	0.0324555	0.0209	0.02236	0.0212973	0.04538	0.04721	0.0453178	0.03183	0.0328556	0.0329631	0.03276	0.0340236	0.0339263
30	0.03447	0.0337806	0.0362731	0.03538	0.0349873	0.0372307	0.02367	0.0242783	0.0245127	0.05424	0.055634	0.0561709	0.04258	0.0417284	0.0433894	0.04083	0.0400134	0.0422835
60	0.04131	0.0408482	0.0425724	0.0476	0.046648	0.0473525	0.03637	0.0359634	0.0382725	0.07959	0.0787002	0.0837534	0.06892	0.0663383	0.0713736	0.05109	0.0491762	0.0500677
90	0.04779	0.0459998	0.0477245	0.05165	0.0510726	0.0534887	0.04518	0.0466357	0.0467884	0.09039	0.0893794	0.0936079	0.08656	0.0887846	0.0892053	0.06077	0.0600906	0.0626271
120	0.05424	0.055634	0.0561709	0.06204	0.059716	0.0639359	0.05706	0.0559187	0.0567633	0.11187	0.109632	0.115289	0.10257	0.101423	0.100518	0.08619	0.0884051	0.0906986
150	0.06313	0.06311	0.0628017	0.06786	0.069604	0.0714098	0.08003	0.0770321	0.0824757	0.11829	0.113859	0.115923	0.11573	0.114436	0.115571	0.12938	0.133549	0.13184
180	0.08179	0.0808756	0.0801534	0.08665	0.0856813	0.0849162	0.10092	0.11023	0.0989006	0.13137	0.12958	0.130687	0.15018	0.14896	0.149399	0.15457	0.152842	0.153766
Fig. 6G-I
	A-B			B-A			A-B			B-A			A-B			B-A
Time(min)	FRLE tilirosided+EGTA(low concentration)						FRLE tiliroside+EGTA (medium concentration)						FRLE tiliroside+EGTA (high concentration)
15	0.02966	0.0306156	0.02945	0.01957	0.0202005	0.0201681	0.02702	0.0278906	0.0284334	0.03138	0.03136	0.03134	0.02966	0.03012	0.0296194	0.01957	0.01924	0.019942
30	0.03673	0.682942	0.0378525	0.02519	0.0246862	0.02517	0.03062	0.0237601	0.0315557	0.04602	0.0455092	0.04665	0.03673	0.0363223	0.0380376	0.02519	0.0246862	0.0265077
60	0.04565	0.0451433	0.0465178	0.03632	0.0359139	0.0370104	0.03906	0.0375968	0.0398025	0.05224	0.0539232	0.0532331	0.04565	0.04394	0.0447366	0.03632	0.03614	0.0374299
90	0.05147	0.0508946	0.0533023	0.04186	0.0402919	0.0440497	0.05034	0.0497812	0.0529733	0.06567	0.0649358	0.0653285	0.05147	0.0527928	0.0533023	0.04186	0.0402919	0.0433502
120	0.05394	0.053337	0.0567616	0.0495	0.0489506	0.0485095	0.06414	0.0628571	0.0664234	0.08132	0.0782738	0.0855738	0.05394	0.053337	0.0558603	0.0495	0.0507722	0.0485095
150	0.06496	0.0625266	0.0636602	0.06016	0.0594874	0.0600776	0.07669	0.0786609	0.0794202	0.08822	0.0904873	0.0864547	0.06496	0.067053	0.0683581	0.06016	0.0594874	0.0598472
180	0.07664	0.0786096	0.0762415	0.07247	0.0743325	0.0750499	0.09844	0.0973394	0.0979281	0.11781	0.115454	0.11587	0.07664	0.0751071	0.074852	0.07247	0.07345	0.0720932
Fig. 6J-L
	A-B			B-A			A-B			B-A			A-B			B-A
Time(min)	FRLE tiliroside pH=5.00(low concentration)						FRLE tiliroside pH=5.00 (medium concentration)						FRLE tiliroside pH=5.00 (high concentration)
15	0.05124	0.05342	0.0522141	0.06035	0.0596801	0.0591424	0.03527	0.34963	0.0352217	0.04236	0.04336	0.0431653	0.06583	0.0630203	0.0670814	0.0656	0.17886	0.0668471
30	0.08563	0.0824223	0.0839166	0.08632	0.0853549	0.0908354	0.06115	0.0604663	0.0630187	0.12376	0.122376	0.127542	0.10953	0.112345	0.113429	0.11736	0.115013	0.115012
60	0.10574	0.108458	0.108971	0.11287	0.111608	0.116888	0.09658	0.0929621	0.0960778	0.14224	0.139395	0.1415	0.14446	0.141571	0.148875	0.16043	0.164553	0.165333
90	0.12436	0.12297	0.130865	0.13487	0.129818	0.139671	0.12945	0.132777	0.134058	0.18368	0.176799	0.190219	0.22186	0.21938	0.220706	0.25156	0.248748	0.264719
120	0.15975	0.156555	0.165437	0.16542	0.169671	0.170475	0.16731	0.165439	0.176062	0.21492	0.212517	0.210619	0.27305	0.262822	0.282771	0.2944	0.283372	0.304881
150	0.18476	0.190713	0.188272	0.21987	0.215472	0.218727	0.19155	0.187719	0.198369	0.25023	0.256661	0.26332	0.32128	0.317688	0.314851	0.35928	0.370856	0.357412
180	0.21	0.207669	0.217476	0.25	0.258055	0.254752	0.22912	0.236502	0.233476	0.3004	0.29987	0.298838	0.36	0.371599	0.371002	0.4	0.395528	0.41424
Fig. 6J-L
	A-B			B-A			A-B			B-A			A-B			B-A
Time(min)	FRLE tiliroside pH=6.00(low concentration)						FRLE tiliroside pH=6.00 (medium concentration)						FRLE tiliroside pH=6.00 (high concentration)
15	0.051403	0.0530592	0.0513326	0.06742	0.06962	0.0673276	0.03345	0.03342	0.0340859	0.0417	0.04258	0.0424927	0.07778	0.13023	0.080157	0.07041	0.0720135	0.0717485
30	0.081236	0.0803343	0.0854855	0.10478	0.103617	0.102683	0.04608	0.0443538	0.0451579	0.13886	0.137308	0.143104	0.09338	0.0957799	0.0951552	0.09853	0.101062	0.101541
60	0.10875	0.107534	0.112622	0.14573	0.150425	0.150918	0.10092	0.103514	0.104004	0.1656	0.170936	0.162286	0.15115	0.14946	0.156531	0.15154	0.156423	0.151332
90	0.13289	0.127912	0.130231	0.18469	0.180996	0.194351	0.15358	0.151863	0.161614	0.21459	0.212208	0.210296	0.21767	0.213316	0.225419	0.23733	0.234677	0.245779
120	0.17468	0.172727	0.180899	0.24876	0.245979	0.257616	0.17848	0.17491	0.184834	0.24914	0.244157	0.262173	0.25939	0.267748	0.2542	0.26434	0.259053	0.273751
150	0.22143	0.217001	0.229313	0.28143	0.288663	0.279967	0.23469	0.242252	0.239151	0.29984	0.307546	0.310514	0.31233	0.308838	0.310706	0.34865	0.359884	0.346837
180	0.26	0.10311	0.258648	0.32	0.07712	0.329779	0.26229	0.259379	0.271628	0.34361	0.36984	0.336734	0.37	0.35614	0.381307	0.45	0.433143	0.440996
Fig. 6M-O
	A-B			B-A			A-B			B-A			A-B			B-A
Time(min)	FRLE tiliroside pH=5.00(low concentration)						FRLE tiliroside pH=5.00 (medium concentration)						FRLE tiliroside pH=5.00 (high concentration)
15	0.48103	0.475652	0.490795	0.70673	0.699521	0.721077	1.40213	1.40385	1.43648	2.71725	2.72692	2.78382	3.02263	3.02635	3.13024	2.7901	2.79353	2.93605
30	1.00994	0.99873	1.04589	1.3184	1.30377	1.3507	2.40291	2.35485	2.46178	3.74641	3.75102	3.87978	4.11274	3.95868	4.2135	3.16702	3.04838	3.2638
60	1.33493	1.28492	1.38245	1.9682	1.89447	2.03827	3.74939	3.75214	3.76	4.80154	4.75256	4.97247	5.3238	5.46062	5.43187	4.45203	4.56645	4.46463
90	1.99307	1.97274	2.0419	2.29997	2.27651	2.30648	5.11254	5.24393	5.21632	5.5216	5.31476	5.65688	6.46474	6.39783	6.33538	5.515	5.45378	5.65012
120	2.51456	2.48853	2.5914	2.70979	2.68174	2.75066	5.97723	5.91626	6.19002	6.69244	6.86444	6.8564	7.9981	7.90932	8.16094	7.05328	6.98028	7.30438
150	2.84789	2.79093	2.83308	3.00401	3.08121	3.16115	6.96595	6.99543	6.96456	8.26572	8.18141	8.43351	9.5609	9.59494	9.58796	9.27588	9.3089	9.09027
180	3.51633	3.6067	3.44597	4.06707	4.02559	4.14988	8.57213	8.40068	8.78215	9.9412	9.8398	10.1436	11.3922	11.2648	11.3874	11	11.1125	10.9978
Fig. 6M-O
	A-B			B-A			A-B			B-A			A-B			B-A
Time(min)	FRLE tiliroside pH=6.00(low concentration)						FRLE tiliroside pH=6.00 (medium concentration)						FRLE tiliroside pH=6.00 (high concentration)
15	3.08828	2.97259	3.24983	3.28311	3.28715	3.34976	3.72936	3.84576	3.70997	4.08828	4.09331	4.18844	3.25565	3.26724	3.45733	3.95876	3.91482	3.95797
30	4.11894	4.07693	4.26557	3.29494	3.37962	3.4673	5.00324	5.03657	5.12582	5.42378	5.56317	5.4227	4.30421	4.25643	4.40966	5.52941	5.54909	5.81865
60	5.17248	5.11465	5.27748	4.30874	4.26479	4.32093	6.15894	6.31722	6.34832	7.32495	7.25024	7.33547	5.96779	5.90692	5.92795	7.92417	8.12782	7.76561
90	6.54703	6.47436	6.70743	4.7106	4.65794	4.85456	6.91814	6.84654	7.08763	10.351	10.617	10.7195	6.53209	6.69996	6.76463	9.02624	8.93417	9.20947
120	7.19887	7.38388	7.05482	5.44693	5.38647	5.64084	9.06753	8.97504	9.06572	11.7558	12.0579	11.6946	10.393	10.2854	10.185	11.2883	11.0625	11.5648
150	8.03458	7.87388	8.28012	6.42924	6.1884	6.76555	10.6761	10.7855	10.8934	13.3336	13.3569	13.605	12.6251	12.4849	12.6608	12.9711	12.4852	12.5874
180	8.3838	8.06974	8.07967	7.94044	7.90256	7.78155	12.3361	13.2547	12.5873	14.6773	14.5687	14.7188	14.721	14.5564	15.0198	15.0502	14.882	14.972
Fig. 6M-O
	A-B			B-A			A-B			B-A			A-B			B-A
Time(min)	FRLE tiliroside pH=8.00(low concentration)						FRLE tiliroside pH=8.00 (medium concentration)						FRLE tiliroside pH=8.00 (high concentration)
15	0.0201166	0.0200856	0.0201104	0.0107117	0.0107178	0.0107055	0.016265	0.0167891	0.0162427	0.0125732	0.00981	0.012556	0.0203645	0.0203458	0.0203366	0.00832258	0.00963551	0.00963165
30	0.0241902	0.0249696	0.024184	0.0149448	0.0147777	0.0154768	0.018175	0.0179733	0.0191257	0.0146752	0.0113921	0.0143815	0.0242196	0.0239508	0.0250818	0.0099879	0.0114463	0.0119868
60	0.0283804	0.028029	0.0283742	0.0177914	0.0174356	0.0181296	0.0218	0.0215563	0.0225761	0.0177134	0.014353	0.018344	0.030472	0.0301313	0.0303135	0.015875	0.0180292	0.0180291
90	0.0334479	0.0329204	0.0340837	0.022184	0.021936	0.022862	0.028025	0.0269752	0.0274642	0.0220764	0.0169834	0.0232313	0.0321916	0.0309857	0.0333376	0.0185847	0.0212966	0.0223041
120	0.0376196	0.0372021	0.0376196	0.0261411	0.0251619	0.0275085	0.03252	0.0321564	0.0336777	0.0300573	0.0233312	0.0311274	0.0404486	0.0399964	0.0396392	0.0315565	0.0352002	0.0376877
150	0.043865	0.0438037	0.0439325	0.0319939	0.032	0.0313537	0.03671	0.0359758	0.0380169	0.0361911	0.0291401	0.0360029	0.0433318	0.0424651	0.0455985	0.0419758	0.049895	0.0511895
180	0.048227	0.0482147	0.0481609	0.0568857	0.0466304	0.0478288	0.05161	0.051555	0.0513416	0.0494586	0.049121	0.0509701	0.0539626	0.0553495	0.0556117	0.0520806	0.0514984	0.0518098
Fig. 6M-O
	A-B			B-A			A-B			B-A			A-B			B-A
Time(min)	FRLE tiliroside pH=9.00(low concentration)						FRLE tiliroside pH=9.00 (medium concentration)						FRLE tiliroside pH=9.00 (high concentration)
15	0.0105774	0.0105611	0.0105742	0.00563226	0.00639927	0.00562903	0.00991768	0.0102372	0.0099041	0.00601829	0.00763424	0.00601005	0.0139679	0.0139551	0.0139488	0.00554839	0.00554301	0.00554079
30	0.0127194	0.0131292	0.0127161	0.00785806	0.00882332	0.00813781	0.0110823	0.0109593	0.011662	0.00702439	0.00886547	0.00688383	0.0166122	0.0164278	0.0172036	0.0066586	0.00658469	0.00689565
60	0.0149226	0.0147378	0.0149194	0.00935484	0.0104102	0.00953267	0.0132927	0.0131441	0.0137659	0.00847866	0.0111697	0.0087805	0.0209006	0.020667	0.020792	0.0105833	0.0103717	0.0103716
90	0.0175871	0.0173097	0.0179214	0.0116645	0.0130973	0.012021	0.0170884	0.0164483	0.0167465	0.0105671	0.0132166	0.0111198	0.0220801	0.021253	0.0228662	0.0123898	0.0122513	0.0128309
120	0.0197806	0.0195611	0.0197806	0.0137452	0.0150234	0.0144642	0.0198293	0.0196076	0.0205352	0.0143872	0.0181566	0.0148994	0.0277436	0.0274334	0.0271884	0.0210376	0.0202496	0.0216805
150	0.0230645	0.0230323	0.0231	0.0168226	0.0191062	0.016486	0.0223841	0.0219364	0.023181	0.0173232	0.0226771	0.0172331	0.0297212	0.0291267	0.0312759	0.0279839	0.0287031	0.0294477
180	0.0253581	0.0253516	0.0253233	0.0235714	0.0241772	0.0244106	0.0314695	0.031436	0.0313059	0.030214	0.0300078	0.0311373	0.0370128	0.037964	0.0381439	0.0347204	0.0343323	0.0345399
